# Supplementary material
Source: Springer Nature journal article supplement (https://www.springermedizin.de/resource/supplementary/12885_2008_1532_MOESM13_ESM.pdf/9472252)

**Additional file 13.**

**a**

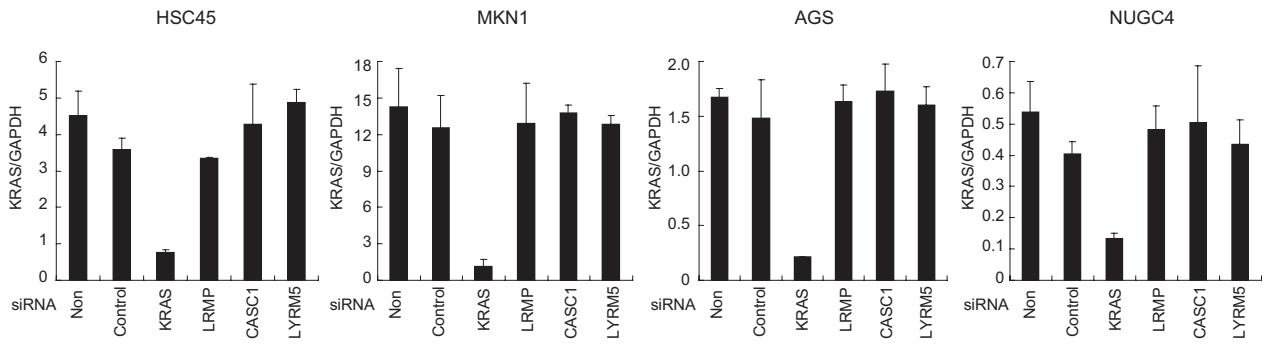

**b**

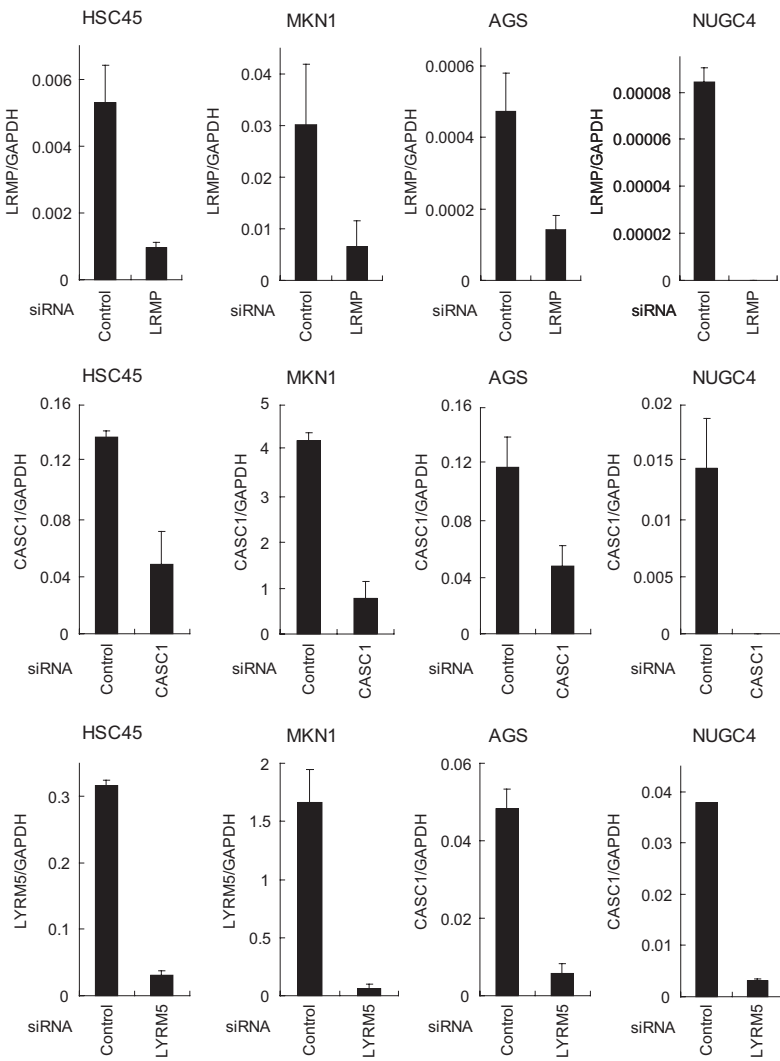

Supplement: MOESM13 [file 9472252]
